# Supplementary material for: Repositioning of a cyclin-dependent kinase inhibitor GW8510 as a ribonucleotide reductase M2 inhibitor to treat human colorectal cancer
Source: PubMed Central journal article supplement (PMC4979501; doi:10.1038/cddiscovery.2016.27), 2016-05-09
Supplement: cddiscovery201627-s1.pdf [file cddiscovery201627-s1.pdf]

## Supplementary Information

### Repositioning of a cyclin-dependent kinase inhibitor GW8510 as a ribonucleotide reductase M2 inhibitor to treat human colorectal cancer

Yao-Yu Hsieh<sup>1,2</sup>, Chia-Jung Chou<sup>1,3</sup>, Hsiang-Ling Lo<sup>1,3</sup>, and Pei-Ming Yang<sup>1,3,\*</sup>

<sup>1</sup>PhD Program for Cancer Biology and Drug Discovery, College of Medical Science and Technology, Taipei Medical University and Academia Sinica, Taipei, Taiwan

<sup>2</sup>Division of Hematology and Oncology, Shuang Ho Hospital, Taipei Medical University, Taipei, Taiwan

<sup>3</sup>Graduate Institute of Cancer Biology and Drug Discovery, College of Medical Science and Technology, Taipei Medical University, Taipei, Taiwan

#### **\*To whom correspondence should be addressed:**

Pei-Ming Yang, Graduate Institute of Cancer Biology and Drug Discovery, College of Medical Science and Technology, Taipei Medical University; 250 Wu-Hsing Street, Taipei 11031, Taiwan; Phone: 886-2-27361661 ext. 7629; Fax: 886-2-26558562; E-mail: yangpm@tmu.edu.tw

#### **Supplementary Information** includes:

Supplementary Figures S1 and S2

Supplementary Table S1

## **Legends to Supplementary Figures**

**Fig. S1. Effect of doxorubicin and daunorubicin on cell viability and RRM2 expression in HCT116 cells.** (A) The chemical structures of phenoxybenzamine (PBZ). (B) HCT116 and DLD-1 cells were treated with various doses of phenoxybenzamine for 72 h. The cell viability was determined by an MTT assay. (C) HCT116 cells were treated with various doses of phenoxybenzamine for 24 h. The protein expressions were analyzed by Western blots.

**Fig. S2. Effect of doxorubicin and daunorubicin on cell viability and RRM2 expression in HCT116 cells.** (A) The chemical structures of doxorubicin (Doxo) and daunorubicin (Dauno). (B) HCT116 cells were treated with various doses of doxorubicin and daunorubicin for 72 h. The cell viability was determined by an MTT assay. (C) HCT116 cells were treated with various doses of doxorubicin and daunorubicin for 24 h. The protein expressions were analyzed by Western blots.

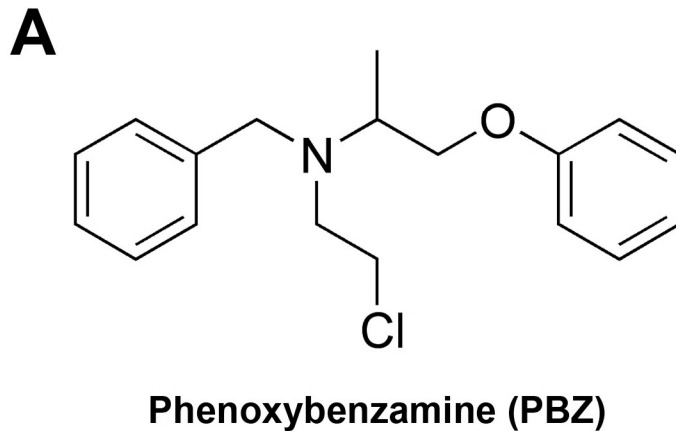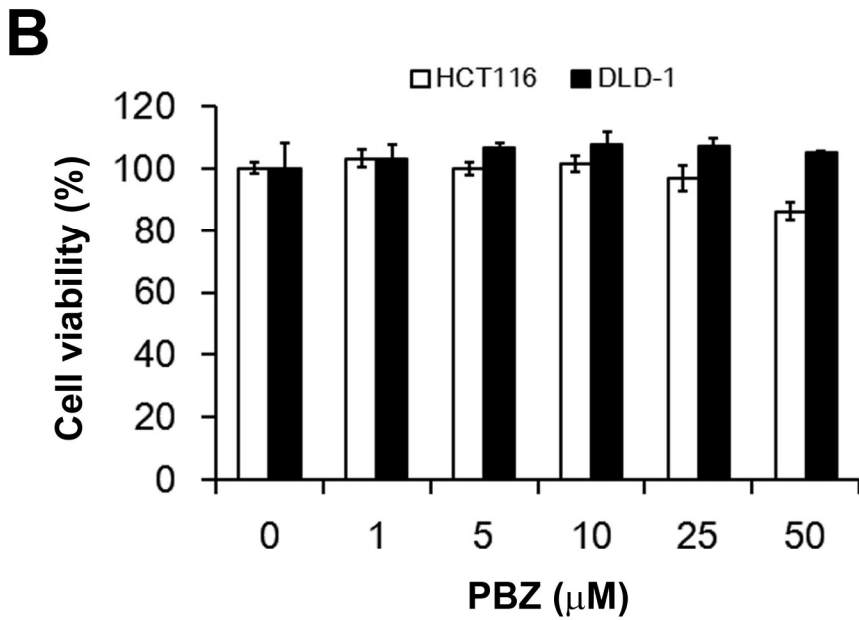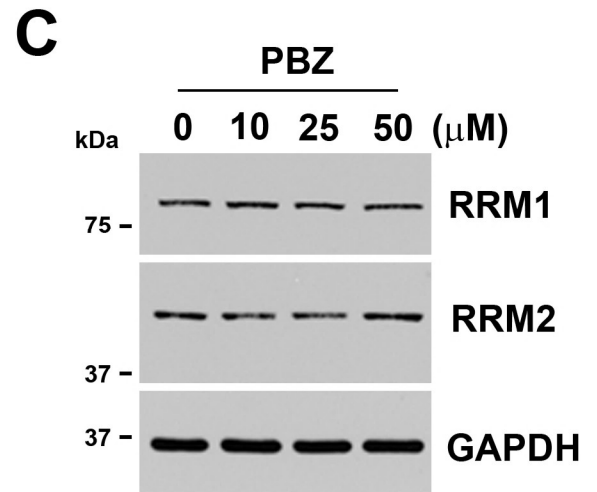

Suppl. Fig. S1

**A**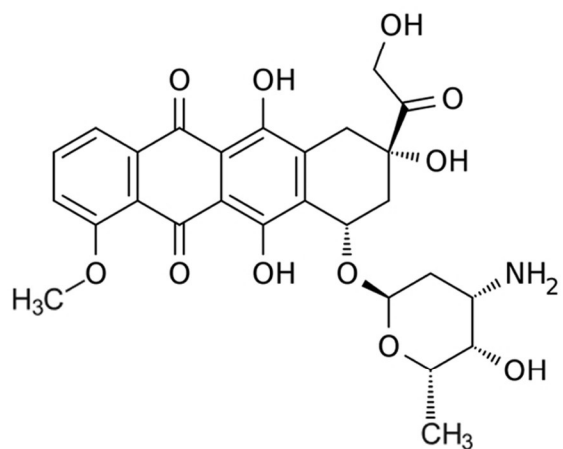**Doxorubicin (Doxo)**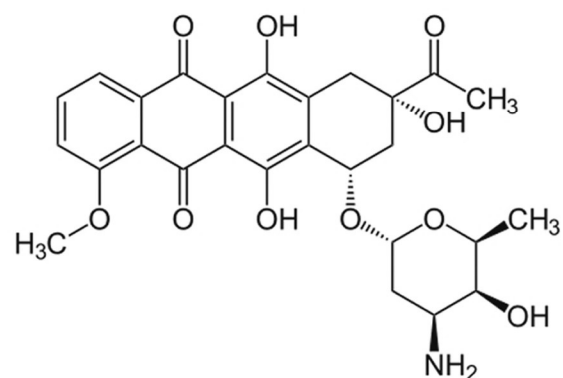**Daunorubicin (Dauno)****B**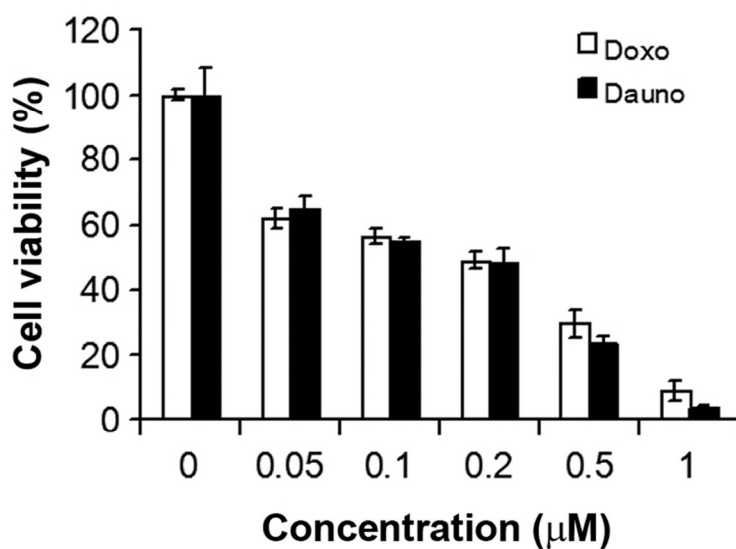**C**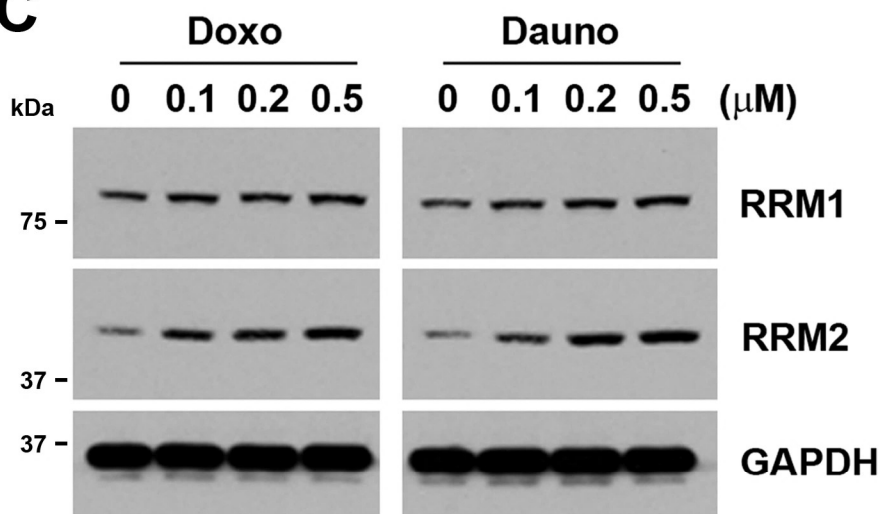

**Supplementary Table S1. Differentially expressed genes induced in RRM2 siRNA-transfected SW480 cells.** This dataset (GSE15212) was obtained from NCBI GEO.

| <b>Gene symbol</b> | <b>Gene title</b>                                                  | <b>Fold change<br/>(Log2)</b> |
|--------------------|--------------------------------------------------------------------|-------------------------------|
| RFTN1              | raftlin, lipid raft linker 1                                       | 1.82                          |
| ANGPTL4            | angiopoietin-like 4                                                | 1.62                          |
| SAMD9              | sterile alpha motif domain containing 9                            | 1.51                          |
| CHI3L1             | chitinase 3-like 1 (cartilage glycoprotein-39)                     | 1.44                          |
| FGFR3              | fibroblast growth factor receptor 3                                | 1.38                          |
| C19orf57           | chromosome 19 open reading frame 57                                | 1.32                          |
| PAG1               | phosphoprotein associated with<br>glycosphingolipid microdomains 1 | 1.29                          |
| AZGP1              | alpha-2-glycoprotein 1, zinc-binding                               | 1.28                          |
| STOM               | stomatin                                                           | 1.27                          |
| TECPR2             | tectonin beta-propeller repeat containing 2                        | 1.25                          |
| PLEK2              | pleckstrin 2                                                       | 1.20                          |
| SLPI               | secretory leukocyte peptidase inhibitor                            | 1.20                          |
| SELENBP1           | selenium binding protein 1                                         | 1.19                          |
| ZNF367             | zinc finger protein 367                                            | 1.19                          |
| IL11               | interleukin 11                                                     | 1.17                          |
| TBX2               | T-box 2                                                            | 1.17                          |
| NOV                | nephroblastoma overexpressed                                       | 1.16                          |
| RASGEF1A           | RasGEF domain family, member 1A                                    | 1.15                          |
| KCNQ2              | potassium voltage-gated channel, KQT-like<br>subfamily, member 2   | 1.15                          |
| GPER               | G protein-coupled estrogen receptor 1                              | 1.15                          |
| COCH               | cochlin                                                            | 1.14                          |
| CH25H              | cholesterol 25-hydroxylase                                         | 1.12                          |
| SUSD3              | sushi domain containing 3                                          | 1.11                          |
| ABCB1              | ATP-binding cassette, sub-family B<br>(MDR/TAP), member 1          | 1.11                          |
| KRTAP2-3           | keratin associated protein 2-3                                     | 1.10                          |
| APOC1              | apolipoprotein C-I                                                 | 1.10                          |
| TLR2               | toll-like receptor 2                                               | 1.10                          |
| G0S2               | G0/G1switch 2                                                      | 1.10                          |
| TRIM15             | tripartite motif containing 15                                     | 1.09                          |
| LOC100506737       | uncharacterized LOC100506737                                       | 1.09                          |

|         |                                                                                            |       |
|---------|--------------------------------------------------------------------------------------------|-------|
| PRRG4   | proline rich Gla (G-carboxyglutamic acid) 4<br>(transmembrane)                             | 1.08  |
| LAT2    | linker for activation of T cells family, member 2                                          | 1.08  |
| TMEM173 | transmembrane protein 173                                                                  | 1.08  |
| RAC2    | ras-related C3 botulinum toxin substrate 2 (rho<br>family, small GTP binding protein Rac2) | 1.07  |
| TFF3    | trefoil factor 3 (intestinal)                                                              | 1.06  |
| CLDN1   | claudin 1                                                                                  | 1.06  |
| STYK1   | serine/threonine/tyrosine kinase 1                                                         | 1.05  |
| CYP3A5  | cytochrome P450, family 3, subfamily A,<br>polypeptide 5                                   | 1.05  |
| CALCA   | calcitonin-related polypeptide alpha                                                       | 1.03  |
| APOLD1  | apolipoprotein L domain containing 1                                                       | 1.03  |
| PROCR   | protein C receptor, endothelial                                                            | 1.03  |
| NOS2    | nitric oxide synthase 2, inducible                                                         | 1.03  |
| ARRDC4  | arrestin domain containing 4                                                               | 1.02  |
| CCL26   | chemokine (C-C motif) ligand 26                                                            | 1.01  |
| SH3YL1  | SH3 domain containing, Ysc84-like 1 (S.<br>cerevisiae)                                     | 1.01  |
| CD82    | CD82 molecule                                                                              | 1.00  |
| AHNAK   | AHNAK nucleoprotein                                                                        | -1.01 |
| OMA1    | OMA1 zinc metallopeptidase                                                                 | -1.06 |
| RCSD1   | RCSD domain containing 1                                                                   | -1.16 |
| H1F0    | H1 histone family, member 0                                                                | -1.16 |
| RRM2    | ribonucleotide reductase M2                                                                | -2.54 |

---
